# Supplementary material for: Patient and public involvement in cancer research: A scoping review
Source: PubMed Central journal article supplement (PMC10417078; doi:10.1002/cam4.6200), 2023-06-16
Supplement: CAM4-12-15530-s001.pdf [file CAM4-12-15530-s001.pdf]

# Patient and public involvement in cancer research: a scoping review

## SUPPLEMENTARY INFORMATION

### Supplementary Table 1. Search strategies

Search strategies also available at: [https://osf.io/audgy/?view\\_only=e66742b5b89e4a22a815adf489c2037b](https://osf.io/audgy/?view_only=e66742b5b89e4a22a815adf489c2037b)

Database(s): Ovid MEDLINE(R) and Epub Ahead of Print, In-Process, In-Data-Review & Other Non-Indexed Citations, Daily and Versions(R) 1946 to March 11, 2021

|    |                                                                                                  |       |
|----|--------------------------------------------------------------------------------------------------|-------|
| 1  | Patient Participation/                                                                           | 26785 |
| 2  | patient oriented research.mp.                                                                    | 328   |
| 3  | patient orientated research.mp.                                                                  | 7     |
| 4  | patient participation.mp.                                                                        | 28504 |
| 5  | "patient and public involvement".mp.                                                             | 826   |
| 6  | (patient* adj2 (involvement or engag* or collaborat* or led or driven)).mp.                      | 26954 |
| 7  | (consumer* adj2 (participation or involvement or engag* or collaborat* or led or driven)).mp.    | 2100  |
| 8  | (lay adj2 (participation or involvement or engag* or collaborat* or led or driven)).mp.          | 273   |
| 9  | (people adj2 (participation or involvement or engag* or collaborat* or led or driven)).mp.       | 3278  |
| 10 | (user* adj2 (participation or involvement or engag* or collaborat* or led or driven)).mp.        | 3489  |
| 11 | (stakeholder* adj2 (participation or involvement or engag* or collaborat* or led or driven)).mp. | 5931  |
| 12 | (parent* adj2 (participation or involvement or engag* or collaborat* or led or driven)).mp.      | 5503  |
| 13 | (caregiver* adj2 (participation or involvement or engag* or collaborat* or led or driven)).mp.   | 1114  |
| 14 | (carer* adj2 (participation or involvement or engag* or collaborat* or led or driven)).mp.       | 386   |
| 15 | (famil* adj2 (participation or involvement or engag* or collaborat* or led or driven)).mp.       | 6799  |
| 16 | ((community adj2 (engag* or collaborat*)) and research).ti,ab.                                   | 3060  |
| 17 | (coproduc* or co-produc*).mp.                                                                    | 5183  |
| 18 | (co-research* or coresearch*).mp.                                                                | 348   |
| 19 | (co-design* or codesign*).mp.                                                                    | 1429  |
| 20 | (patient advisor* and research).mp.                                                              | 111   |
| 21 | (advisory council* and research).mp.                                                             | 320   |
| 22 | (advisory panel* and research).mp.                                                               | 497   |
| 23 | (peer research* or peer-led research).mp.                                                        | 145   |
| 24 | (partnership* adj2 research*).mp.                                                                | 1754  |
| 25 | patient partner*.mp.                                                                             | 561   |
| 26 | community partner*.mp.                                                                           | 2854  |
| 27 | participatory research.mp.                                                                       | 7306  |
| 28 | action research.mp.                                                                              | 4507  |
| 29 | (patient-centered adj3 research).mp.                                                             | 1012  |

|    |                                        |         |
|----|----------------------------------------|---------|
| 30 | (patient-centred adj3 research).mp.    | 112     |
| 31 | participatory design.mp.               | 580     |
| 32 | (GRIPP or GRIPP2).mp.                  | 107     |
| 33 | research priorit*.mp.                  | 5832    |
| 34 | (patient* views and research).mp.      | 1209    |
| 35 | or/1-34                                | 108408  |
| 36 | exp Neoplasms/                         | 3428595 |
| 37 | (cancer* or neoplasm* or oncolog*).mp. | 3510244 |
| 38 | 36 or 37                               | 4058595 |
| 39 | 35 and 38                              | 13034   |
| 40 | limit 39 to yr="2005 -Current"         | 9599    |

**Search update run in Ovid MEDLINE March 3, 2022. Added these lines to search:**

41. (2021031\* OR 202104\* OR 202105\* OR 202106\* OR 202107\* OR 202108\* OR 202109\* OR 20211\* OR 2022\*).dt,ez,da.

42. 40 AND 42

Search update yielded 1663 results.

**Database(s): Ovid Embase 1974 to 2021 March 11**

|    |                                                                                                  |       |
|----|--------------------------------------------------------------------------------------------------|-------|
| 1  | Patient Participation/                                                                           | 28827 |
| 2  | patient oriented research.tw.                                                                    | 332   |
| 3  | patient orientated research.tw.                                                                  | 9     |
| 4  | patient participation.tw.                                                                        | 3152  |
| 5  | patient involvement.tw.                                                                          | 3433  |
| 6  | "patient and public involvement".tw.                                                             | 829   |
| 7  | (patient* adj2 (engag* or collaborat* or led or driven)).tw.                                     | 23899 |
| 8  | (consumer* adj2 (participation or involvement or engag* or collaborat* or led or driven)).tw.    | 2473  |
| 9  | (lay adj2 (participation or involvement or engag* or collaborat* or led or driven)).tw.          | 322   |
| 10 | (people adj2 (participation or involvement or engag* or collaborat* or led or driven)).tw.       | 4257  |
| 11 | (user* adj2 (participation or involvement or engag* or collaborat* or led or driven)).tw.        | 4017  |
| 12 | (stakeholder* adj2 (participation or involvement or engag* or collaborat* or led or driven)).tw. | 6012  |
| 13 | (parent* adj2 (participation or involvement or engag* or collaborat* or led or driven)).tw.      | 6707  |
| 14 | (caregiver* adj2 (participation or involvement or engag* or collaborat* or led or driven)).tw.   | 1581  |
| 15 | (carer* adj2 (participation or involvement or engag* or collaborat* or led or driven)).tw.       | 540   |
| 16 | (famil* adj2 (participation or involvement or engag* or collaborat* or led or driven)).tw.       | 9068  |
| 17 | ((community adj2 (engag* or collaborat*)) and research).tw.                                      | 3822  |
| 18 | (coproduc* or co-produc*).tw.                                                                    | 5865  |
| 19 | (co-research* or coresearch*).tw.                                                                | 455   |
| 20 | (co-design* or codesign*).tw.                                                                    | 1741  |
| 21 | (patient advisor* and research).tw.                                                              | 155   |
| 22 | (advisory council* and research).tw.                                                             | 304   |

|    |                                           |         |
|----|-------------------------------------------|---------|
| 23 | (advisory panel* and research).tw.        | 339     |
| 24 | (peer research* or peer-led research).tw. | 209     |
| 25 | (partnership* adj2 research*).tw.         | 2000    |
| 26 | patient partner*.tw.                      | 895     |
| 27 | community partner*.tw.                    | 3560    |
| 28 | participatory research.tw.                | 4262    |
| 29 | action research.tw.                       | 5250    |
| 30 | (patient-centered adj3 research).tw.      | 1181    |
| 31 | (patient-centred adj3 research).tw.       | 149     |
| 32 | participatory design.tw.                  | 548     |
| 33 | (GRIPP or GRIPP2).tw.                     | 54      |
| 34 | research priorit*.tw.                     | 6785    |
| 35 | (patient* views and research).tw.         | 716     |
| 36 | or/1-35                                   | 117804  |
| 37 | exp *Neoplasm/                            | 3455858 |
| 38 | (cancer* or neoplasm* or oncolog*).tw.    | 2882795 |
| 39 | 37 or 38                                  | 4530459 |
| 40 | 36 and 39                                 | 13298   |
| 41 | limit 40 to yr="2005 -Current"            | 11851   |

**Search update run in Ovid Embase March 3, 2022. Added this line to search:**

42. limit 40 to dc=20210312-20220303  
Search update yielded 2464 results.

**Database: EBSCO CINAHL, initial search March 12, 2021:**

|     |                                                                                            |        |
|-----|--------------------------------------------------------------------------------------------|--------|
| S1  | (MH "Consumer Participation")                                                              | 20,967 |
| S2  | "patient oriented research"                                                                | 115    |
| S3  | "patient orientated research"                                                              | 1      |
| S4  | "patient participation"                                                                    | 1,518  |
| S5  | "patient and public involvement"                                                           | 433    |
| S6  | (patient* n2 (involvement or engag* or collaborat* or led or driven))                      | 18,137 |
| S7  | (consumer* n2 (participation or involvement or engag* or collaborat* or led or driven))    | 22,163 |
| S8  | (lay n2 (participation or involvement or engag* or collaborat* or led or driven))          | 248    |
| S9  | (people n2 (participation or involvement or engag* or collaborat* or led or driven))       | 3,945  |
| S10 | (user* n2 (participation or involvement or engag* or collaborat* or led or driven))        | 3,236  |
| S11 | (stakeholder* n2 (participation or involvement or engag* or collaborat* or led or driven)) | 4,191  |
| S12 | (parent* n2 (participation or involvement or engag* or collaborat* or led or driven))      | 5,151  |
| S13 | (caregiver* n2 (participation or involvement or engag* or collaborat* or led or driven))   | 1,229  |
| S14 | (carer* (participation or involvement or engag* or collaborat* or led or driven))          | 944    |
| S15 | (famil* n2 (participation or involvement or engag* or collaborat* or led or driven))       | 6,499  |
| S16 | ((community n2 (engag* or collaborat*)) and research)                                      | 3,098  |

|     |                                                                                                                                                                                                                                   |         |
|-----|-----------------------------------------------------------------------------------------------------------------------------------------------------------------------------------------------------------------------------------|---------|
| S17 | coproduc* or co-produc*                                                                                                                                                                                                           | 1,029   |
| S18 | co-research* or coresearch*                                                                                                                                                                                                       | 341     |
| S19 | co-design* or codesign*                                                                                                                                                                                                           | 859     |
| S20 | "patient advisor*" and research                                                                                                                                                                                                   | 39      |
| S21 | "advisory council*" and research                                                                                                                                                                                                  | 144     |
| S22 | "advisory panel*" and research                                                                                                                                                                                                    | 232     |
| S23 | "peer research*" or "peer-led research"                                                                                                                                                                                           | 113     |
| S24 | partnership* n2 research*                                                                                                                                                                                                         | 1,447   |
| S25 | "patient partner*"                                                                                                                                                                                                                | 329     |
| S26 | "community partner*"                                                                                                                                                                                                              | 2,155   |
| S27 | "participatory research"                                                                                                                                                                                                          | 2,567   |
| S28 | "action research"                                                                                                                                                                                                                 | 8,487   |
| S29 | "patient-centered" n3 research                                                                                                                                                                                                    | 601     |
| S30 | "patient-centred" n3 research                                                                                                                                                                                                     | 99      |
| S31 | "participatory design"                                                                                                                                                                                                            | 311     |
| S32 | GRIPP or GRIPP2                                                                                                                                                                                                                   | 55      |
| S33 | "research priorit*"                                                                                                                                                                                                               | 5,946   |
| S34 | "patient* views" and research                                                                                                                                                                                                     | 487     |
| S35 | S1 OR S2 OR S3 OR S4 OR S5 OR S6 OR S7 OR S8 OR S9 OR S10 OR S11 OR S12 OR S13 OR S14 OR S15 OR S16 OR S17 OR S18 OR S19 OR S20 OR S21 OR S22 OR S23 OR S24 OR S25 OR S26 OR S27 OR S28 OR S29 OR S30 OR S31 OR S32 OR S33 OR S34 | 81,846  |
| S36 | (MH "Neoplasms+")                                                                                                                                                                                                                 | 575,329 |
| S37 | cancer* or neoplasm* or oncolog*                                                                                                                                                                                                  | 662,454 |
| S38 | S36 OR S37                                                                                                                                                                                                                        | 734,567 |
| S39 | S35 AND S38                                                                                                                                                                                                                       | 6,978   |
| S40 | S35 AND S38 [limit applied: 2005-present]                                                                                                                                                                                         | 6,114   |

**Search update run in CINAHL March 3, 2022. Added these lines to search:**

41. ZD (2021031\* OR 202104\* OR 202105\* OR 202106\* OR 202107\* OR 202108\* OR 202109\* OR 20211\* OR 2022\* OR "in process")  
42. S40 AND S41

Search update yielded 1057 results.

**Database: EBSCO PsycInfo, initial search March 12, 2021:**

|    |                                                                                         |       |
|----|-----------------------------------------------------------------------------------------|-------|
| S1 | DE "Client Participation"                                                               | 2,409 |
| S2 | "patient oriented research"                                                             | 90    |
| S3 | "patient orientated research"                                                           | 3     |
| S4 | "patient participation"                                                                 | 5,817 |
| S5 | "patient and public involvement"                                                        | 249   |
| S6 | (patient* n2 (involvement or engag* or collaborat* or led or driven))                   | 9,302 |
| S7 | (consumer* n2 (participation or involvement or engag* or collaborat* or led or driven)) | 5,260 |

|     |                                                                                                                                                                                                                                   |        |
|-----|-----------------------------------------------------------------------------------------------------------------------------------------------------------------------------------------------------------------------------------|--------|
| S8  | (lay n2 (participation or involvement or engag* or collaborat* or led or driven))                                                                                                                                                 | 212    |
| S9  | (people n2 (participation or involvement or engag* or collaborat* or led or driven))                                                                                                                                              | 6,758  |
| S10 | (user* n2 (participation or involvement or engag* or collaborat* or led or driven))                                                                                                                                               | 3,869  |
| S11 | (stakeholder* n2 (participation or involvement or engag* or collaborat* or led or driven))                                                                                                                                        | 2,770  |
| S12 | (parent* n2 (participation or involvement or engag* or collaborat* or led or driven))                                                                                                                                             | 17,496 |
| S13 | (caregiver* n2 (participation or involvement or engag* or collaborat* or led or driven))                                                                                                                                          | 1,365  |
| S14 | (carer* (participation or involvement or engag* or collaborat* or led or driven))                                                                                                                                                 | 355    |
| S15 | (famil* n2 (participation or involvement or engag* or collaborat* or led or driven))                                                                                                                                              | 11,550 |
| S16 | ((community n2 (engag* or collaborat*)) and research)                                                                                                                                                                             | 4,896  |
| S17 | coproduc* or co-produc*                                                                                                                                                                                                           | 1,237  |
| S18 | co-research* or coresearch*                                                                                                                                                                                                       | 1,292  |
| S19 | co-design* or codesign*                                                                                                                                                                                                           | 579    |
| S20 | "patient advisor*" and research                                                                                                                                                                                                   | 33     |
| S21 | "advisory council*" and research                                                                                                                                                                                                  | 158    |
| S22 | "advisory panel*" and research                                                                                                                                                                                                    | 139    |
| S23 | "peer research*" or "peer-led research"                                                                                                                                                                                           | 144    |
| S24 | partnership* n2 research*                                                                                                                                                                                                         | 1,672  |
| S25 | "patient partner"                                                                                                                                                                                                                 | 195    |
| S26 | "community partner"                                                                                                                                                                                                               | 2,430  |
| S27 | "participatory research"                                                                                                                                                                                                          | 4,007  |
| S28 | "action research"                                                                                                                                                                                                                 | 10,228 |
| S29 | "patient-centered" n3 research                                                                                                                                                                                                    | 904    |
| S30 | "patient-centred" n3 research                                                                                                                                                                                                     | 59     |
| S31 | "participatory design"                                                                                                                                                                                                            | 460    |
| S32 | GRIPP or GRIPP2                                                                                                                                                                                                                   | 22     |
| S33 | "research priorit"                                                                                                                                                                                                                | 1,537  |
| S34 | "patient* views" and research                                                                                                                                                                                                     | 430    |
| S35 | S1 OR S2 OR S3 OR S4 OR S5 OR S6 OR S7 OR S8 OR S9 OR S10 OR S11 OR S12 OR S13 OR S14 OR S15 OR S16 OR S17 OR S18 OR S19 OR S20 OR S21 OR S22 OR S23 OR S24 OR S25 OR S26 OR S27 OR S28 OR S29 OR S30 OR S31 OR S32 OR S33 OR S34 | 84,567 |
| S36 | DE "Neoplasms" OR DE "Benign Neoplasms" OR DE "Breast Neoplasms" OR DE "Endocrine Neoplasms" OR DE "Leukemias" OR DE "Melanoma" OR DE "Metastasis" OR DE "Nervous System Neoplasms" OR DE "Terminal Cancer"                       | 53,798 |
| S37 | TI cancer* or neoplasm* or oncolog*                                                                                                                                                                                               | 31,170 |
| S38 | AB cancer* or neoplasm* or oncolog*                                                                                                                                                                                               | 51,519 |
| S39 | S36 OR S37 OR S38                                                                                                                                                                                                                 | 70,159 |
| S40 | S35 AND S39                                                                                                                                                                                                                       | 2,927  |
| S41 | S35 AND S39 [search limited to 2005-present]                                                                                                                                                                                      | 2,592  |

**Search update run in PsycInfo March 3, 2022.**

Reran search and applied limiter: Published Date: 20210101-20221231  
Search update yielded 113 results.

**Supplementary Table 2: Established frameworks and their different levels of involvement**

|                                                                                     | Framework                                                                                                                                                                                                                                                                                                                                                                                                                                                                                                            | Country (Reference)                                                     | LEVELS OF INVOLVEMENT                                                                                                |
|-------------------------------------------------------------------------------------|----------------------------------------------------------------------------------------------------------------------------------------------------------------------------------------------------------------------------------------------------------------------------------------------------------------------------------------------------------------------------------------------------------------------------------------------------------------------------------------------------------------------|-------------------------------------------------------------------------|----------------------------------------------------------------------------------------------------------------------|
|    | The Montreal model<br>CEPPP <a href="https://ceppp.ca/en/resources/">https://ceppp.ca/en/resources/</a>                                                                                                                                                                                                                                                                                                                                                                                                              | Canada (Quebec)<br>(Pomey et al., 2015)                                 | <b>4 levels</b><br>Information<br>Consultation<br>Collaboration<br>Partnership                                       |
|    | SPOR<br><a href="https://www.cihr-irsc.gc.ca/en/strategy-for-patient-oriented-research-patient-engagement-framework">Strategy for Patient-Oriented Research - Patient Engagement Framework - CIHR (cihr-irsc.gc.ca)</a><br><br>PORLET<br><a href="https://static1.squarespace.com/static/5c869fd0e666695abe893b3b/t/61b0f04d878a731b75039cdf/1638985805316/PORLET+2021+12+08.pdf">https://static1.squarespace.com/static/5c869fd0e666695abe893b3b/t/61b0f04d878a731b75039cdf/1638985805316/PORLET+2021+12+08.pdf</a> | Canada<br>(Amirav et al., 2017)                                         | <b>5 or 6 levels</b><br>Learn / Inform<br>[Participate]<br>Consult<br>Involve<br>Collaborate<br>Lead/Support/Empower |
|    | INVOLVE NIHR<br><a href="https://www.nihr.ac.uk/about/involve/briefing-notes-for-researchers-public-involvement-in-nhs-health-and-social-care-research/">Briefing notes for researchers - public involvement in NHS, health and social care research   NIHR</a>                                                                                                                                                                                                                                                      | United Kingdom<br>(National Institute for Health Research (NIHR), 2021) | <b>4 levels</b><br>Consultation<br>Collaboration<br>co-production<br>user controlled research                        |
|   | CRUK<br><a href="https://www.cancerresearchuk.org/infrastructure/patient-involvement-toolkit-for-researchers">Patient involvement toolkit for researchers   Cancer Research UK</a>                                                                                                                                                                                                                                                                                                                                   | United Kingdom<br>(Cancer Research UK)                                  | <b>3 levels</b><br>Participation<br>Engagement<br>Involvement                                                        |
|  | National Framework for Consumer Involvement in Cancer Control<br><a href="https://www.canceraustralia.gov.au/sites/default/files/publications/national_consumer_framework_web_504af020f2184.pdf">https://www.canceraustralia.gov.au/sites/default/files/publications/national_consumer_framework_web_504af020f2184.pdf</a>                                                                                                                                                                                           | Australia<br>(Cancer Australia and Cancer Voices Australia, 2011)       | <b>5 levels</b><br>Informing<br>Consulting<br>Involving<br>Partnership<br>Consumer-led                               |
|  | ONCODE<br><a href="https://www.oncodeinstitute.nl/en/patient-engagement-programme">Oncode Institute - Patient Engagement Programme</a>                                                                                                                                                                                                                                                                                                                                                                               | The Netherlands<br>(Oncode Institute, 2021)                             | <b>5 levels</b><br>Informing<br>consulting<br>involving<br>Collaborating<br>Devolving                                |

|                                                                                   |                                                                                                                                                                                                                                                          |                                                |                                                                                                                             |
|-----------------------------------------------------------------------------------|----------------------------------------------------------------------------------------------------------------------------------------------------------------------------------------------------------------------------------------------------------|------------------------------------------------|-----------------------------------------------------------------------------------------------------------------------------|
|  | <p>KCE<br/> <a href="https://kce.fgov.be/en/position-of-kce-on-patient-involvement-in-health-care-policy-research">Position du KCE concernant l'implication des patients dans les projets de recherche en politique des soins de santé (fgov.be)</a></p> | <p>Belgium<br/> (Cleemput I et al., 2019)</p>  | <p><b>3 levels</b><br/> Consultation (targeted or integrated)<br/> Collaboration/coproduction<br/> Patient-led research</p> |
|  | <p>PCORI<br/> <a href="https://www.pcori.org/our-work/engaging-patients-researchers">The Value of Engagement   PCORI</a></p>                                                                                                                             | <p>United States<br/> (Frank et al., 2015)</p> | <p><b>4 levels</b><br/> Stakeholder input<br/> Consultation<br/> Collaboration<br/> Shared leadership</p>                   |

## REFERENCES

- Amirav, I., Vandall-Walker, V., Rasiah, J., and Saunders, L. (2017). Patient and Researcher Engagement in Health Research: A Parent's Perspective. *Pediatrics* 140. 10.1542/peds.2016-4127.
- Cancer Australia and Cancer Voices Australia (2011). National Framework, for Consumer Involvement in Cancer Control. Cancer Australia. [https://www.canceraustralia.gov.au/sites/default/files/publications/national\\_consumer\\_framework\\_web\\_504af020f2184.pdf](https://www.canceraustralia.gov.au/sites/default/files/publications/national_consumer_framework_web_504af020f2184.pdf).
- Cancer Research UK. Patient involvement toolkit for researchers. <https://www.cancerresearchuk.org/funding-for-researchers/patient-involvement-toolkit-for-researchers>.
- Cleemput I, Dauvrin M, Kohn L, Mistiaen P, Christiaens W, and Léonard C (2019). Position of KCE on patient involvement in health care policy research. <https://kce.fgov.be/en/position-of-kce-on-patient-involvement-in-health-care-policy-research>.
- Frank, L., Forsythe, L., Ellis, L., Schrandt, S., Sheridan, S., Gerson, J., Konopka, K., and Daugherty, S. (2015). Conceptual and practical foundations of patient engagement in research at the patient-centered outcomes research institute. *Qual Life Res* 24, 1033-1041. 10.1007/s11136-014-0893-3.
- National Institute for Health Research (NIHR) (2021). Briefing notes for researchers - public involvement in NHS, health and social care research. <https://www.nihr.ac.uk/documents/briefing-notes-for-researchers-public-involvement-in-nhs-health-and-social-care-research/27371>.
- Oncode Institute (2021). Patient Engagement Programme. <https://www.oncode.nl/research/programs/patient-engagement-programme>.
- Pomey, M.P., Flora, L., Karazivan, P., Dumez, V., Lebel, P., Vanier, M.C., Debarges, B., Clavel, N., and Jouet, E. (2015). [The Montreal model: the challenges of a partnership relationship between patients and healthcare professionals]. *Sante Publique* 27, S41-50.

**Supplementary Table 3.** Characteristics of PPI participants in cancer research studies

| Author (year)  | Country | Cancer type     | PPI participant age /Specificity | previous cancer / survivor | in treatment | palliative/end-of life | informal carers / relatives | advocates /associations/ representatives | public (without direct experience with cancer) | Characteristics provided | Diversity awareness mentioned (Age, Income, Social, rural/urban, Education, Ethnicity, under-research communities)                                                                                                                                                                                                                                                                                                         | Number of PPI participants                                                                                                                                                                        | Training provided | Any mention to PPI remuneration / costs |
|----------------|---------|-----------------|----------------------------------|----------------------------|--------------|------------------------|-----------------------------|------------------------------------------|------------------------------------------------|--------------------------|----------------------------------------------------------------------------------------------------------------------------------------------------------------------------------------------------------------------------------------------------------------------------------------------------------------------------------------------------------------------------------------------------------------------------|---------------------------------------------------------------------------------------------------------------------------------------------------------------------------------------------------|-------------------|-----------------------------------------|
| Kelly 2006     | UK      | Breast          | ADULTS                           | X                          |              |                        |                             |                                          |                                                |                          | Participants ranged in age from 44 to 61 years of age. The majority of participants were Caucasian (n=9) with one being Afro-Caribbean. Nine were married with one participant widowed.                                                                                                                                                                                                                                    | <u>10 patients</u>                                                                                                                                                                                |                   |                                         |
| Wright 2006    | UK      | Different types | ADULTS                           | X                          | X            | X                      | X                           |                                          |                                                |                          | Purposely selected population groups: This provides an exploration of the research views and priorities of participants with specific population characteristics often underrepresented in research studies, including people from diverse ethnic minoritized backgrounds (South Asian, Black), specific age groups [teenagers (13–19 years), over 75 years old], and patients in the palliative phase of illness.         | <u>25 patients:</u><br>past patients, carers or people working with patients in a consumer involvement capacity of which 15 became co-researchers                                                 | X                 | X                                       |
| Carey 2007     | AU      | Not specified   | ADULTS                           |                            | X            |                        |                             |                                          |                                                |                          | we ensured that the interviews selected for the resource showed a range of different types of people, in order to maximize audience identification                                                                                                                                                                                                                                                                         | <u>57 patients</u>                                                                                                                                                                                |                   |                                         |
| Corner 2007    | UK      | Different types | ADULTS                           | X                          | X            | X                      | X                           | X                                        |                                                | X                        | To ensure that people from diverse communities and backgrounds were included, consultation groups were also run with purposively selected participants from frequently under researched communities.                                                                                                                                                                                                                       | <u>105 patients</u><br>15 patients co-researchers                                                                                                                                                 | X                 |                                         |
| Juraskova 2008 | AU      | Breast          | ADULTS                           | X                          |              |                        |                             | X                                        |                                                |                          | Women were on average 60 years of age and 29 were married. Two women had postgraduate qualifications, and 15 were in professional occupations. All but one woman was born in Australia or the UK, 11 had medical training and 11 had a chronic medical condition, including osteoporosis (n = 3). The sample was representative of women participating in the IBIS-I trial.                                                | <u>31 women</u> participating in a breast cancer prevention trial and who are currently in follow-up and the Australian New Zealand Breast Cancer Trials Group (ANZ BCTG) Consumer Advisory Board |                   |                                         |
| Head 2009      | US      | Head and Neck   | ADULTS                           | X                          |              |                        |                             |                                          |                                                |                          |                                                                                                                                                                                                                                                                                                                                                                                                                            | <u>39 past patients</u> involved to give input for the development of the algorithm via a survey                                                                                                  |                   |                                         |
| Saunders 2009  | AU      | Neuroendocrine  | ADULTS                           |                            | X            |                        | X                           |                                          |                                                | X                        |                                                                                                                                                                                                                                                                                                                                                                                                                            | <u>6 patients, 5 caregivers and key stakeholder</u> comprising consumers, representatives of the Cancer Council and researchers                                                                   |                   | X                                       |
| Forbes 2010    | UK      | Breast          | ADULTS (women aged 60 to 75)     | X                          | X            |                        |                             |                                          | X                                              | X                        | We recruited women with breast cancer with the help of two cancer charities: Macmillan, which advertised for volunteers on its website, and Breast Cancer Care, which sent out a flyer with its newsletter. We also directly contacted an Asian women's breast cancer support group. We recruited women who had not had a previous diagnosis of breast cancer using research recruitment agencies, who approached women in | <u>69 women:</u><br>15 women had a previous diagnosis of breast cancer and 54 did not                                                                                                             |                   | X                                       |



|                |        |                    |                                  |   |   |   |   |   |   |   |                                                                                                                                                                                                                                                                                                                                                                                                                                                                                                                                                                                                                    |                                                                                                                                                                             |  |   |
|----------------|--------|--------------------|----------------------------------|---|---|---|---|---|---|---|--------------------------------------------------------------------------------------------------------------------------------------------------------------------------------------------------------------------------------------------------------------------------------------------------------------------------------------------------------------------------------------------------------------------------------------------------------------------------------------------------------------------------------------------------------------------------------------------------------------------|-----------------------------------------------------------------------------------------------------------------------------------------------------------------------------|--|---|
|                |        |                    |                                  |   |   |   |   |   |   |   | public areas and from existing databases of people willing to take part in research, to invite them to participate.<br>We aimed to achieve a mix of women by age and income and living in rural and urban locations. We achieved a good range of characteristics by age, ethnic group, income, rural or urban residence and living arrangements.                                                                                                                                                                                                                                                                   |                                                                                                                                                                             |  |   |
| Robotin 2010   | AU     | Neuroendocrine     | ADULTS                           | X |   |   | X |   |   |   |                                                                                                                                                                                                                                                                                                                                                                                                                                                                                                                                                                                                                    | <u>consumer representatives:</u><br>patients with a PC diagnosis, current and bereaved carers of patients with PC.                                                          |  |   |
| Skorpen 2010   | NO     | Not specified      | ADULTS (intellectual disability) | X |   |   | X |   | X |   |                                                                                                                                                                                                                                                                                                                                                                                                                                                                                                                                                                                                                    | <u>19 participants:</u><br>2 with ID and cancer diagnosis, 10 with ID and experience with cancer, 2 mothers of patients with ID with cancer, 5 caregivers of people with ID |  |   |
| Saunders 2012  | AU     | Not specified      | ADULTS                           | X |   |   | X | X |   |   | Workshop: Participants ranged in age from 18 to 72 years. More females (n=18) than males (n= 14) attended the workshop.<br>Questionnaires: The majority of respondents were female (56%) aged between 61–70 years (41%).                                                                                                                                                                                                                                                                                                                                                                                           | <u>89 participants:</u><br>32 patients and caregivers (workshop) and 57 via questionnaire                                                                                   |  |   |
| Boelens 2014   | Europe | Colorectal         | ADULTS                           | X |   |   |   | X |   |   |                                                                                                                                                                                                                                                                                                                                                                                                                                                                                                                                                                                                                    | <u>5 participants:</u><br>patients representatives and colon or rectal cancer survivors                                                                                     |  |   |
| Taylor 2015    | UK     | Pediatric cancer   | AYAS                             | X |   |   |   |   |   |   | young people aged 17–26 years, eight female, who were diagnosed with cancer aged between 14–25 years                                                                                                                                                                                                                                                                                                                                                                                                                                                                                                               | <u>9 young people</u>                                                                                                                                                       |  |   |
| Gerritsen 2016 | NL     | Neuroendocrine     | ADULTS                           |   | X | X |   |   |   |   |                                                                                                                                                                                                                                                                                                                                                                                                                                                                                                                                                                                                                    | <u>150 patients</u> diagnosed with pancreatic or periampullary cancer                                                                                                       |  |   |
| Huddy 2016     | UK     | Esophageal/Gastric | ADULTS                           |   |   |   |   | X | X |   | Limitations: to weigh the benefits and challenges of each and to recruit different participants with different backgrounds and motivations.<br>we hope to have achieved an overall representative sample in the course of the three events, although sociocultural and clinical characteristics of participants were not recorded.                                                                                                                                                                                                                                                                                 | <u>38 participants:</u><br>members of the Oesophageal Patients Association (n=12) and general public without previous experience of OG cancer (n=26)                        |  | X |
| Sperling 2016  | DK     | Different types    | AYAS                             | X | X |   |   |   |   |   | AYA patients differing in age (range 17–38 years), cancer type (breast cancer, lymphoma, sarcoma, blood cancer, and ovarian cancer), gender, and representing diverse geographical areas.                                                                                                                                                                                                                                                                                                                                                                                                                          | <u>21 AYAs</u><br>And a youth panel was involved through the entire process (9 AYAs)                                                                                        |  |   |
| Wan 2016       | UK     | Endometrial        | ADULTS                           | X | X |   | X |   | X | X | the lay participants predominantly identify as white and under 60 years old. It is notable that individuals of Asian (i.e. people identifying as of Indian, Pakistani, Bangladeshi or other South Asian ethnicity) and Black ethnicity and older women who make up a substantial proportion of women diagnosed with EC are under-represented. In order to ensure that views of older women were represented during the initial consultation phase and the final consensus meeting, we specifically invited several women over 65 years of age to participate over and above those recruited from generic call out. | <u>211 participants:</u><br>steering group of representatives and 211 patients, carers and individuals who identified themselves as being at risk of EC                     |  |   |
| Crawford 2017  | US     | Not specified      | ADULTS                           | X | X |   |   |   |   |   | 11 men and 8 women. The racial and ethnic breakdown was 8 African American, 1 Asian American, 7 white, and 3 Latino                                                                                                                                                                                                                                                                                                                                                                                                                                                                                                | <u>37 participants:</u><br>7 oncology patient partners (paid consultants)<br>19 participants for usability<br>11 patients for feasibility                                   |  | X |



|                   |                                 |                                |                                                               |   |   |  |   |   |   |                                                                                                                                                                                                                                                                                                                                                                                                                                                                                                                                                                                                                                                                                                                    |                                                                                                                                                                                              |                                                                |   |   |
|-------------------|---------------------------------|--------------------------------|---------------------------------------------------------------|---|---|--|---|---|---|--------------------------------------------------------------------------------------------------------------------------------------------------------------------------------------------------------------------------------------------------------------------------------------------------------------------------------------------------------------------------------------------------------------------------------------------------------------------------------------------------------------------------------------------------------------------------------------------------------------------------------------------------------------------------------------------------------------------|----------------------------------------------------------------------------------------------------------------------------------------------------------------------------------------------|----------------------------------------------------------------|---|---|
| Mayland<br>2019   | UK (7<br>countries<br>involved) | Not specified                  | ADULTS                                                        |   |   |  | X | X | X | hospital volunteers or representatives from PPI forums<br><br>ensure that there was male representation; and in addition, some specific sub-groups were targeted within certain countries, for example, Turkish volunteers in Germany.                                                                                                                                                                                                                                                                                                                                                                                                                                                                             | <u>83 participants:</u><br>48 PPI representatives; 35 bereaved relatives                                                                                                                     |                                                                |   |   |
| Payne<br>2019     | US                              | Lymphoma                       | ADULTS                                                        | X |   |  | X |   |   | Phase I: Participants predominantly were female (11 participants; 73%) and included respondents who self-identified as white (7 participants; 46.7%) or black/African American (3 participants; 20%).<br>Phase II: median age was 63 years (range, 21-80 years). Participants predominantly were female (55%), white (17 participants; 89.5%), and lived in rural areas (63.2%), with 1 African-American participant and 1 Hispanic participant identified.<br>Limitations: One limitation of the current study is the lack of diversity with regard to race and sex among the study sample. The majority of participants were white and female, thus limiting generalizability.                                   | <u>34 participants:</u><br>8 lymphoma survivors and 7 lymphoma caregivers for phase I (Focus groups)<br>19 patients/caregivers for phase 2 (individual interviews)                           |                                                                |   |   |
| Phillips<br>2019  | UK                              | Pediatric cancer               | ADULTS<br>(parents<br>and<br>childhood<br>cancer<br>survivor) | X |   |  | X |   |   |                                                                                                                                                                                                                                                                                                                                                                                                                                                                                                                                                                                                                                                                                                                    | <u>5 participants:</u><br>4 parents;<br>1 survivor                                                                                                                                           |                                                                | X |   |
| Rafie<br>2019     | US                              | Lung                           | ADULTS                                                        |   | X |  | X |   |   | Topic Group members were predominantly female (76%) with greater than a high school education (91%). TGs had greater representation from adults older than 65 years (28%) and people of Caucasian race (62%).<br>Participants of varying socioeconomic, educational, and professional backgrounds contributed to the lung cancer outcomes research agenda.<br>The selection process ensured diverse viewpoints on the problem. This is illustrated by the fact that individual representatives within each group fell into five of the seven stakeholder categories outlined in the 7Ps Framework for Stakeholder Engagement, including patients and the public, providers, purchasers, payers, and policy makers. | <u>7 participants:</u><br>lung cancer patients and caregivers                                                                                                                                |                                                                | X |   |
| Janssen<br>2020   | AU                              | Breast                         | ADULTS                                                        |   |   |  |   | X |   |                                                                                                                                                                                                                                                                                                                                                                                                                                                                                                                                                                                                                                                                                                                    | <u>1 consumer representative</u>                                                                                                                                                             |                                                                |   |   |
| Nicholas<br>2020  | UK                              | Esophageal /<br>diferent types | ADULTS                                                        | X |   |  | X |   |   | There was a wide geographical representation. In an attempt to acquire a broader view, we deliberately invited and successfully recruited patients from non-urban areas of the UK and patients with no prior experience in PPI work, giving a voice to an often under-represented group of patients.                                                                                                                                                                                                                                                                                                                                                                                                               | <u>21 participants:</u><br>patients and caregivers                                                                                                                                           |                                                                | X |   |
| Birkeland<br>2020 | DE                              | Prostate                       | ADULTS                                                        | X |   |  |   |   | X | X                                                                                                                                                                                                                                                                                                                                                                                                                                                                                                                                                                                                                                                                                                                  | Public sphere selecting men encountered at pedestrian streets, in market malls, in hospitals, and among academic course at tenders with various backgrounds in middle sized provincial towns | <u>33 participants:</u><br>30 men of the public;<br>3 patients |   | X |
| Schmidt<br>2020   | CH                              | Breast                         | ADULTS                                                        | X |   |  | X | X |   |                                                                                                                                                                                                                                                                                                                                                                                                                                                                                                                                                                                                                                                                                                                    | <u>8 Participants:</u><br>4 Breast cancer survivors;<br>1 patient advocate;<br>2 family members/relatives;<br>1 patient partner                                                              |                                                                |   |   |
| Snaman<br>2020    | US                              | Pediatric cancer               | ADULTS<br>(bereaved<br>parents)                               |   |   |  | X |   |   |                                                                                                                                                                                                                                                                                                                                                                                                                                                                                                                                                                                                                                                                                                                    | <u>5 bereaved parents</u>                                                                                                                                                                    |                                                                |   |   |

|                        |    |                          |                                  |   |   |  |   |   |   |   |                                                                                                                                                                                                                                                                                                                                                                                                                                                                                                                                                                                                                                                                                                                                                                                                   |                                                                                                                                                                                                                      |  |   |
|------------------------|----|--------------------------|----------------------------------|---|---|--|---|---|---|---|---------------------------------------------------------------------------------------------------------------------------------------------------------------------------------------------------------------------------------------------------------------------------------------------------------------------------------------------------------------------------------------------------------------------------------------------------------------------------------------------------------------------------------------------------------------------------------------------------------------------------------------------------------------------------------------------------------------------------------------------------------------------------------------------------|----------------------------------------------------------------------------------------------------------------------------------------------------------------------------------------------------------------------|--|---|
| Ector<br>2021          | NL | chronic myeloid leukemia | adults                           |   | X |  |   |   |   | x |                                                                                                                                                                                                                                                                                                                                                                                                                                                                                                                                                                                                                                                                                                                                                                                                   | <u>203 CML patients</u> treated or starting TKI.                                                                                                                                                                     |  |   |
| Handley<br>2021        | US | different types          | adults                           |   | X |  | X | X |   | x | <p>participants from a diverse group of sites across the catchment area, with representation from patients and caregivers engaging in care at the SKCC academic hub, an urban community hospital, and a suburban community hospital.</p> <p>In addition, although a variety of cancer types and demographics were represented in both the focus groups and cognitive interviews, the majority of participants were White and female, were relatively young for patients with cancer, and had relatively high income and education, which may have affected the ultimate tool by overemphasizing or underemphasizing certain domains. In our catchment area, approximately 52% of patients are female, 72.6% are Caucasian, and 16.9% are Black, with 63% of patients age older than 65 years.</p> | <p><u>40 participants:</u><br/>Patient and family advisory committee before starting; 23 participants (17 patients and 6 caregivers) across four focus groups; 17 participants in cognitive interviews</p>           |  |   |
| Da Silva Lopes<br>2021 | CH | Melanoma                 | adults                           |   |   |  |   | X |   |   |                                                                                                                                                                                                                                                                                                                                                                                                                                                                                                                                                                                                                                                                                                                                                                                                   | <u>1 patient advocate</u>                                                                                                                                                                                            |  |   |
| Schilstra<br>2022      | AU | different types          | adolescent and young adult (AYA) | X |   |  |   |   |   | x | The six AYAs were on average 24.2 years old (R = 19–31), 83% (N = 5) female, and all Caucasian-Australian. All but one came from the local Sydney area                                                                                                                                                                                                                                                                                                                                                                                                                                                                                                                                                                                                                                            | <u>6 AYA cancer survivors</u>                                                                                                                                                                                        |  | X |
| Taggart<br>2021        | AU | colorectal               | adults                           | X |   |  |   |   |   |   |                                                                                                                                                                                                                                                                                                                                                                                                                                                                                                                                                                                                                                                                                                                                                                                                   | <u>1 consumer</u> with lived experience of cancer                                                                                                                                                                    |  |   |
| Yan<br>2021            | US | Lung                     | adults                           |   |   |  | X | X | X |   | 12 PAC members from various racial backgrounds: one-third were women, one was African American and one was Hispanic                                                                                                                                                                                                                                                                                                                                                                                                                                                                                                                                                                                                                                                                               | <p><u>12 participants:</u><br/>Veterans and Veteran advocates patient advocates included senior Wisconsin members of the American Cancer Society, American Legion and Vietnam Veterans of America organizations.</p> |  | X |
| Mazariego<br>2020      | AU | Not specified            | adults                           | X |   |  | X |   |   |   | Participants were from five of eight Australian states and territories with the majority residing in New South Wales and Western Australia                                                                                                                                                                                                                                                                                                                                                                                                                                                                                                                                                                                                                                                        | <p><u>9 participants:</u><br/>5 consumers in Delphi round 1 and 4 in round 2; Working Group: cancer patients and survivors</p>                                                                                       |  |   |

|                  |    |                                         |        |   |   |   |   |   |  |   |                                                                                                                                                                                                                                                                                                                                                                                                                                                                                                                                                                                                                                                                                                                                                                                                                           |                                                                                                                                                    |  |   |
|------------------|----|-----------------------------------------|--------|---|---|---|---|---|--|---|---------------------------------------------------------------------------------------------------------------------------------------------------------------------------------------------------------------------------------------------------------------------------------------------------------------------------------------------------------------------------------------------------------------------------------------------------------------------------------------------------------------------------------------------------------------------------------------------------------------------------------------------------------------------------------------------------------------------------------------------------------------------------------------------------------------------------|----------------------------------------------------------------------------------------------------------------------------------------------------|--|---|
| Stover<br>2021   | US | different types                         | adults |   | X |   | X | X |  | X | diverse demographic and clinical characteristics of patients with cancer. Patients were purposively sampled to maximize the variety of responses rather than establish generalizable samples. Goal: to recruit at least 20% of the total patients who were >65 years of age, had an ethnic minority heritage, and/or had a high school education or less.<br>Of the 56 patients interviewed, 48% were women, 34% were age $\leq$ 65 years, 23% were ethnic minority, and 20% had a high school education or less. Cancer types included genitourinary (32%), GI (27%), breast (21%), and lung (20%). Primary caregivers (n = 21) were 71% female, 24% age $\geq$ 65 years, 76% non-Hispanic white, and 14% with a high school education or less. Caregiver relationships were typically spouse/partner or an adult child. | <u>56 patients</u>                                                                                                                                 |  |   |
| Perry<br>2021    | US | Not specified (metastatic / palliative) | adults |   |   | X | X |   |  |   |                                                                                                                                                                                                                                                                                                                                                                                                                                                                                                                                                                                                                                                                                                                                                                                                                           | <u>10 patient participants:</u><br>Stakeholder advisory board was comprised of patients with metastatic cancer, family members                     |  |   |
| Dunn<br>2021     | AU | Prostate                                | adults | X |   |   |   | X |  | x | community groups and consumers from diverse backgrounds, including LGBTQIA people and those from regional, rural and urban settings.                                                                                                                                                                                                                                                                                                                                                                                                                                                                                                                                                                                                                                                                                      | <u>16 participants:</u><br>People with experience in provision of support in the community from a range of professional and academic organizations |  |   |
| Wang<br>2021     | CN | Liver cancer                            | adults |   | X |   |   |   |  |   |                                                                                                                                                                                                                                                                                                                                                                                                                                                                                                                                                                                                                                                                                                                                                                                                                           | <u>16 patients</u> with PLC                                                                                                                        |  |   |
| Gibson<br>2021   | UK | Not specified                           | AYA    | X | X |   | X | X |  |   |                                                                                                                                                                                                                                                                                                                                                                                                                                                                                                                                                                                                                                                                                                                                                                                                                           | <u>4 representatives</u> as co-authors<br>expert steering group including young people                                                             |  |   |
| Wong<br>2021     | CN | Not specified                           | adults | X | X |   | X |   |  | X |                                                                                                                                                                                                                                                                                                                                                                                                                                                                                                                                                                                                                                                                                                                                                                                                                           | <u>17 participants:</u><br>patients with cancer [n=5], cancer survivors [n=6], caregivers [n=6].                                                   |  |   |
| Adams<br>2021    | CA | Not specified                           | adults |   |   |   |   |   |  |   |                                                                                                                                                                                                                                                                                                                                                                                                                                                                                                                                                                                                                                                                                                                                                                                                                           | <u>185 participants:</u><br>4 cancer survivors and support persons in the workshop; 78-55-48 participants in the 3 Delphi rounds                   |  |   |
| Sekse<br>2021    | NO | Gynecological                           | adults | X |   |   |   | X |  |   |                                                                                                                                                                                                                                                                                                                                                                                                                                                                                                                                                                                                                                                                                                                                                                                                                           | <u>10 women participants</u>                                                                                                                       |  | X |
| Bergerod<br>2021 | NO | Not specified                           | adults |   |   |   | X | X |  | x |                                                                                                                                                                                                                                                                                                                                                                                                                                                                                                                                                                                                                                                                                                                                                                                                                           | <u>5 next-of-kin representatives</u>                                                                                                               |  | X |

|                           |                        |               |                       |   |   |  |   |   |  |   |                                                                                                                                                                                                                                                                                            |                                                                                                                                                                                                                                                                                                                       |  |   |
|---------------------------|------------------------|---------------|-----------------------|---|---|--|---|---|--|---|--------------------------------------------------------------------------------------------------------------------------------------------------------------------------------------------------------------------------------------------------------------------------------------------|-----------------------------------------------------------------------------------------------------------------------------------------------------------------------------------------------------------------------------------------------------------------------------------------------------------------------|--|---|
| Haase<br>2021             | CA                     | Not specified | older adults          | X | X |  | X | X |  | x | Participants attending from rural and urban areas, thereby representing a more diverse cross-section of viewpoints.                                                                                                                                                                        | <u>36 participants:</u><br>1 co-researcher and 35 older adults and caregivers (25 patients, 8 caregivers, 2 both)                                                                                                                                                                                                     |  | X |
| Woodford<br>2022          | SE                     | Pediatric     | adults<br>(parents)   |   |   |  | X |   |  |   |                                                                                                                                                                                                                                                                                            | <u>4 Participants:</u><br>parent research partner (PRP) group consisted of 2 mothers and 2 fathers                                                                                                                                                                                                                    |  |   |
| Crawford-Williams<br>2021 | AU                     | Not specified | adults<br>(survivors) | X |   |  |   | X |  |   |                                                                                                                                                                                                                                                                                            | <u>18 participants:</u><br>10 cancer survivors; 8 cancer advocacy representatives                                                                                                                                                                                                                                     |  |   |
| Zhong<br>2021             | CA                     | Breast        | adults                | X |   |  | X | X |  |   | 24 participants face-to-face workshop: varying socioeconomic and cultural backgrounds arising from geographically diverse areas throughout Canada.                                                                                                                                         | <u>552 participants:</u><br>Steering group included 5 breast reconstruction patients, 2 community partners who were also breast cancer survivors; Survey 521 patients and caregivers; face-to-face workshop 24 participants including breast reconstruction patients, mastectomy patients, family members, caregivers |  |   |
| Smith<br>2021             | US                     | Bladder       | adults                | X |   |  | X | X |  |   | We also recognize the need to improve socioeconomic and racial/ ethnic diversity among our patient advocates. Identifying engaged patient partners with diverse backgrounds and perspectives is integral to designing a generalizable study that likewise supports a diversity of patients | advocate advisory board (AAB) composed of <u>patients and caregivers</u> and led by a key advocacy organization leader                                                                                                                                                                                                |  |   |
| Kanapathy<br>2021         | UK                     | Breast        | adults                | X |   |  | X |   |  |   |                                                                                                                                                                                                                                                                                            | <u>85 participants:</u><br>Patients were part of the steering committee; Delphi panel 12 patients; Survey 71 patients; 2 carers                                                                                                                                                                                       |  |   |
| Jones<br>2017             | CA                     | Kidney        | adults                |   | X |  | X |   |  |   |                                                                                                                                                                                                                                                                                            | <u>19 participants:</u><br>Steering group included 7 patients/caregivers 12 participants (Workshop: 10 patients; 2 caregivers).                                                                                                                                                                                       |  |   |
| Beyer<br>2021             | Europe<br>(consortium) | Prostate      | adults                |   | X |  |   | X |  |   |                                                                                                                                                                                                                                                                                            | <u>30 participants:</u><br>3 patient experts for the consensus meetings; 27 patients from different European countries for the interviews                                                                                                                                                                             |  |   |

|                  |    |                |                               |   |   |  |   |   |  |   |                                                                                                                                                                                                                                                                                                                                                                                                                                                                                                                                                                                                                                              |                                                                                                                                                                                                              |                                                 |   |
|------------------|----|----------------|-------------------------------|---|---|--|---|---|--|---|----------------------------------------------------------------------------------------------------------------------------------------------------------------------------------------------------------------------------------------------------------------------------------------------------------------------------------------------------------------------------------------------------------------------------------------------------------------------------------------------------------------------------------------------------------------------------------------------------------------------------------------------|--------------------------------------------------------------------------------------------------------------------------------------------------------------------------------------------------------------|-------------------------------------------------|---|
| Furukawa<br>2022 | JP | Not specified  | adults                        | X |   |  | X |   |  |   |                                                                                                                                                                                                                                                                                                                                                                                                                                                                                                                                                                                                                                              | 6 Participants<br>Co-author KH is a cancer patient himself; 3 cancer survivors; 2 bereaved family members.                                                                                                   |                                                 |   |
| Shojaie<br>2021  | US | Endocrine      | adults                        | X | X |  | X |   |  |   | race, education, religion, health insurance                                                                                                                                                                                                                                                                                                                                                                                                                                                                                                                                                                                                  | 50 participants:<br>4 patients and family members in stakeholder Advisory panel; 46 patients with medullary thyroid cancer or survivor; 10 family members.                                                   |                                                 | X |
| Cavers<br>2020   | UK | Not specified  | adults                        |   | X |  | X | X |  |   | To reach a wide audience, relevant organisations such as the National Institute for Health Research's INVOLVE, Our Voice Scotland, and the Alliance were tagged<br><br>Limitations: There are also limitations to the number of people taking part in the consultation and reflections to be made on the planning process to ensure a broader scope and diversity of consultants, speaking to existing debates around whether or not patient involvement includes the voices of a wide enough group of people, including those from marginalised groups and those less able to expertly self-advocate and articulate their views and beliefs | 19 participants:<br>Workshop: 6 attendees and Online consultation: 10 responses<br>1 patient member of the panel member<br>1 patient member as Advisory Board<br>1 patient invited to join the research team | Importance mentioned, but training not provided |   |
| Flegg<br>2020    | CA | Retinoblastoma | Adults (parents or survivors) | X |   |  | X |   |  | X | Respondents were primarily female (50 [85%]) and Ontario residents (34 [58%]). Patients were parents (28 [74%]) or survivors (10 [26%]); the mean patient age was 38 (standard deviation 8) years.<br><br>Limitations: Patient survey participants may not have been representative of the broader Canadian retinoblastoma community. Only 38 patients participated in the survey, largely female parents from Ontario                                                                                                                                                                                                                       | 53 participants<br>Online survey: 38 patients<br>The working group included 1 patient<br>Steering committee: 4 patients<br>workshop participants: 10 patients                                                |                                                 | X |







**Supplementary Table 6: Co-design studies identified**

| First author | Publication year | Title                                                                                                                                                                                                                           | Method / approach             | Level of implication                                    |               |
|--------------|------------------|---------------------------------------------------------------------------------------------------------------------------------------------------------------------------------------------------------------------------------|-------------------------------|---------------------------------------------------------|---------------|
| Anderson     | 2021             | THRIVE intervention development: using participatory action research principles to guide a mHealth app-based intervention to improve oncology care.                                                                             | participatory action research | patients as subjects                                    | participation |
| Bangerter    | 2021             | A hybrid method of healthcare delivery research and human-centered design to develop technology-enabled support for caregivers of hematopoietic stem cell transplant recipients.                                                | design thinking               | patients as subjects                                    | participation |
| Bessa        | 2021             | Designing a Pragmatic Intervention to Help Improve the Bladder Cancer Patient Experience.                                                                                                                                       | discussion groups             | patients as subjects                                    | participation |
| Brady        | 2020             | Using experience-based co-design to improve the pre-treatment care pathway for people diagnosed with head and neck cancer.                                                                                                      | experience-based co-design    | patients as subjects                                    | participation |
| Brady        | 2022             | An evaluation of the provision of oncology rehabilitation services via telemedicine using a participatory design approach.                                                                                                      | participatory design          | patients as subjects                                    | participation |
| Brown        | 2020             | Using qualitative and co-design methods to inform the development of an intervention to support and improve physical activity in childhood cancer survivors: a study protocol for BEing Active after ChildhOod caNcer (BEACON). | co-design                     | patients as subjects                                    | participation |
| Cooley       | 2018             | Algorithm-based decision support for symptom self-management among adults with Cancer: results of usability testing.                                                                                                            | user co-design                | patients on expert design committee                     |               |
| Grant        | 2021             | What do cancer survivors and their health care providers want from a healthy living program? Results from the first round of a co-design project.                                                                               | user co-design                | patients as subjects                                    | participation |
| Grynne       | 2022             | Integrating perspectives of patients, healthcare professionals, system developers and academics in the co-design of a digital information tool.                                                                                 | experience-based co-design    | patients on expert design committee                     |               |
| Hall         | 2021             | Patient and health care professional co-development of an Acceptance and Commitment Therapy intervention to support hormone therapy decision-making and well-being in women with breast cancer.                                 | co-design                     | patients as subjects                                    | participation |
| Houghton     | 2022             | Free Time For Wellness: a co-designed intervention utilizing social networks to encourage physical activity for cancer prevention among low resourced mothers.                                                                  | co-design                     | patients as subjects                                    | participation |
| Huh          | 2021             | Making of Mobile SunSmart: Co-designing a Just-in-Time Sun Protection Intervention for Children and Parents.                                                                                                                    | co-design                     | patients on expert design committee                     |               |
| Hyatt        | 2020             | Co-design and development of online video resources about immunotherapy with patients and their family                                                                                                                          | experience-based co-design    | unclear who is on the steering committee - not explicit |               |
| McGrath      | 2021             | Co-design and implementation of an exercise intervention for women with ovarian cancer                                                                                                                                          | review paper                  |                                                         |               |
| McMullen     | 2018             | Designing for impact: identifying stakeholder-driven interventions to support recovery after major cancer surgery.                                                                                                              | co-design                     | patients as subjects                                    | participation |
| Mehdizadeh   | 2021             | mHealth Self-Management System to Supporting Children with a Acute Lymphocytic Leukemia (ALL) and their caregivers in low-middle income country: Qualitative Co-Design Study.                                                   | co-design                     | patients as subjects                                    | participation |

|                  |      |                                                                                                                                                                                                             |                                                    |                                                                          |               |
|------------------|------|-------------------------------------------------------------------------------------------------------------------------------------------------------------------------------------------------------------|----------------------------------------------------|--------------------------------------------------------------------------|---------------|
| Moser            | 2021 | Improving the experience of older people with colorectal and breast cancer in patient-centred cancer care pathways using experience-based co-design.                                                        | experience-based co-design                         | patients and community representatives included in co-design             |               |
| Nguyen           | 2021 | Developing an Online Tool to Promote Safe Sun Behaviors With Young Teenagers as Co-researchers.                                                                                                             | co-design                                          | patients as co-researchers                                               |               |
| Perera           | 2022 | Codesigning a supportive online resource for Australian cancer carers: a thematic analysis of informal carers' and healthcare professionals' perspectives about carers' responsibilities and content needs. | co-design                                          | patients as subjects                                                     | participation |
| Perry            | 2021 | iSelf-Help: a co-designed, culturally appropriate, online pain management programme in Aotearoa.                                                                                                            | co-design                                          | patients on advisory board                                               |               |
| Petit-Steeghs    | 2021 | Co-creating an empowering health education intervention for urological cancer patients                                                                                                                      | co-design                                          | patient representative organizations in designing / conducting the study |               |
| Ruland           | 2006 | Children as design partners in the development of a support system for children with cancer.                                                                                                                | co-design                                          | patients involved in data collection                                     |               |
| Santin           | 2019 | Using a six-step co-design model to develop and test a peer-led web-based resource (PLWR) to support informal carers of cancer patients.                                                                    | co-design                                          | patients as subjects                                                     | participation |
| Singleton        | 2021 | Co-designing a Lifestyle-Focused Text Message Intervention for Women After Breast Cancer Treatment: Mixed Methods Study.                                                                                    | experience-based co-design                         | patients and community representatives included in co-design             |               |
| Sun              | 2021 | The multidisciplinary, theory-based co-design of a new digital health intervention supporting the care of oesophageal cancer patients.                                                                      | co-design                                          | patients as subjects                                                     | participation |
| Tang             | 2020 | Adopting a collaborative approach in developing a prehabilitation program for patients with prostate cancer utilising experience-based co-design methodology.                                               | experience-based co-design                         | patients as subjects                                                     | participation |
| Taylor           | 2014 | How patients' feedback was used to redesign a head and neck service.                                                                                                                                        | co-design                                          | patients as subjects                                                     | participation |
| Tseng            | 2021 | Developing a Web-Based Shared Decision-Making Tool for Fertility Preservation Among Reproductive-Age Women With Breast Cancer: An Action Research Approach.                                                 | action research                                    | patients as subjects                                                     | participation |
| Tsianakas        | 2012 | Implementing patient-centred cancer care: using experience-based co-design to improve patient experience in breast and lung cancer services.                                                                | experience-based co-design                         | patients as subjects                                                     | participation |
| vanBeusekom 2021 | 2021 | Using Co-design With Breast Cancer Patients and Radiographers to Develop "KEW" Communication Skills Training.                                                                                               | co-design                                          | patients as subjects                                                     | participation |
| vanBruinessen    | 2014 | Active patient participation in the development of an online intervention.                                                                                                                                  | co-design                                          | patient partner involved in design/conducting the study                  |               |
| White            | 2021 | Engaging Carers in Co-Design: Development of the Carer Readiness Tool.                                                                                                                                      | development of a tool to determine carer readiness |                                                                          |               |
| Young            | 2020 | A framework for youth-friendly genetic counseling.                                                                                                                                                          | framework development                              |                                                                          |               |
| Haines           | 2021 | Harmonizing evidence-based practice, implementation context, and implementation strategies with user-centered design: a case example in young adult cancer care.                                            | co-design                                          | patients on expert design committee                                      |               |
| Krieger          | 2022 | Optimizing Patient Information Material for a New Psycho-Oncological Care Program Using a Participatory Health Research Approach in Germany.                                                                | participatory action research                      | patients on expert design committee                                      |               |
